# Supplementary material
Source: Springer Nature journal article supplement (https://www.springermedizin.de/resource/supplementary/12943_2013_1490_MOESM5_ESM.pdf/9553180)

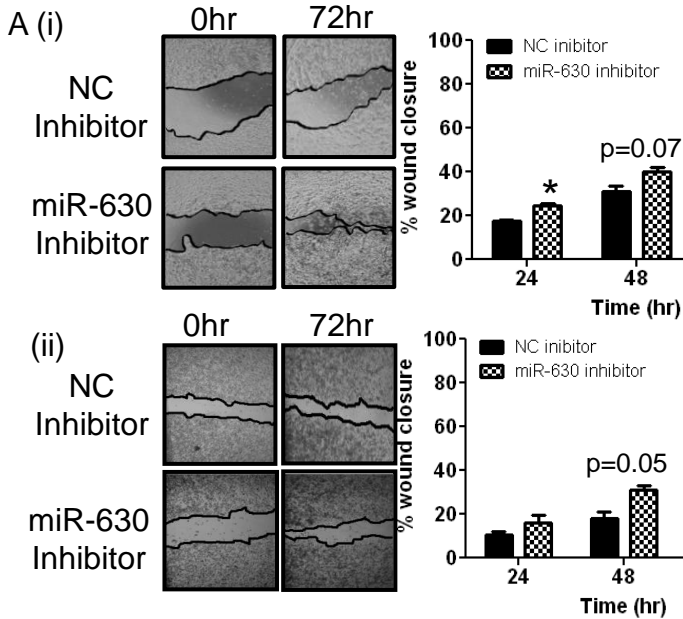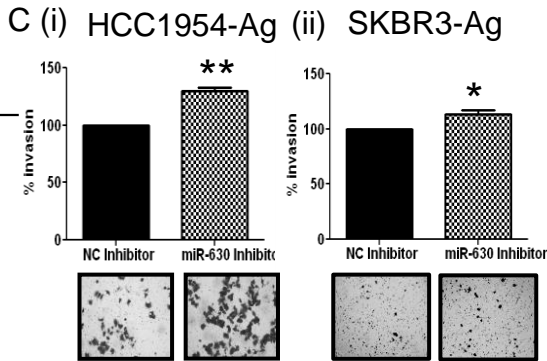

**B (i) HCC1954-Ag**

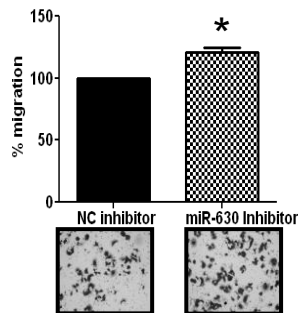

**(ii) SKBR3-Ag**

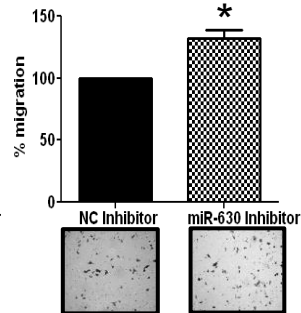

**D (i) HCC1954-Ag**

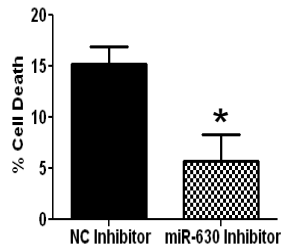

**(ii) SKBR3-Ag**

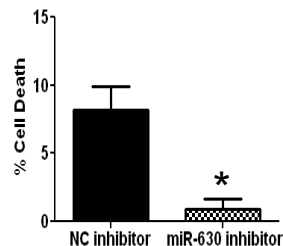

Supplement: MOESM5 [file 9553180]
